# Supplementary material for: Alternative activation generates IL-10 producing type 2 innate lymphoid cells
Source: PubMed Central journal article supplement (PMC5711851; doi:10.1038/s41467-017-02023-z), 2017-12-01
Supplement: 41467_2017_2023_MOESM3_ESM.pdf [file 41467_2017_2023_MOESM3_ESM.pdf]

## **Description of Additional Supplementary Files**

File Name: Supplementary Data 1

Description: Differentially expressed genes upon ILC2 activation

File Name: Supplementary Data 2

Description: Differentially expressed genes comparing ILC2<sub>act</sub> and ILC2<sub>10</sub>

File Name: Supplementary Data 3

Description: RNAseq dataset from cultured ILC2
